# Supplementary material
Source: Springer Nature journal article supplement (https://publikationen.ub.uni-frankfurt.de/opus4/files/22066/13064_2011_173_MOESM1_ESM.PDF)
Supplement: MOESM1 [file 13064_2011_173_MOESM1_ESM.PDF]

***ShhCreERneo-GIFM***

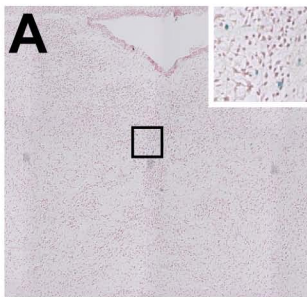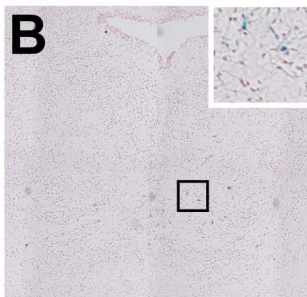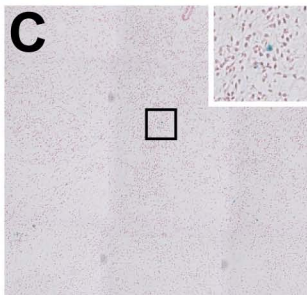

***ShhCreER-GIFM***

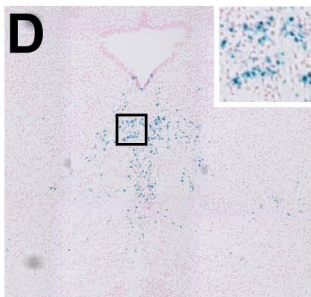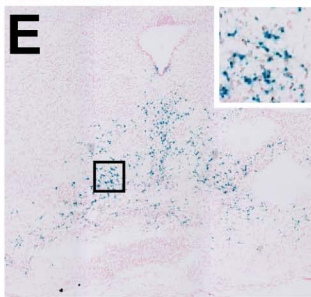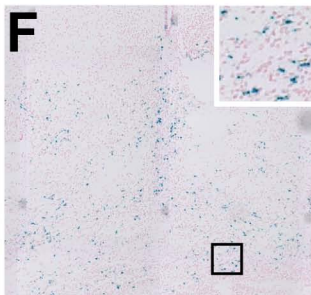

posterior

anterior
